# Supplementary material for: Blueberry red ringspot virus genomes from Florida inferred through analysis of blueberry root transcriptomes
Source: PubMed Central journal article supplement (PMC7374169; doi:10.1038/s41598-020-68654-3), 2020-07-21
Supplement: 41598_2020_68654_MOESM1_ESM.pdf [file 41598_2020_68654_MOESM1_ESM.pdf]

Supplementary information:

Blueberry red ringspot virus genomes from Florida inferred through analysis of blueberry root transcriptomes

Saad, N. <sup>1</sup>, Alcalá-Briseño, R.I.<sup>1</sup>, Polston, J.E.<sup>1</sup>, Olmstead, J.W. <sup>2</sup>, Varsani, A. <sup>3,4</sup>, Harmon, P.F. <sup>1</sup>

<sup>1</sup> Department of Plant Pathology, University of Florida, Gainesville, Florida, United States.

<sup>2</sup> Horticultural Sciences Department, University of Florida, Gainesville, Florida, United States.

<sup>3</sup> The Biodesign Center of Fundamental and Applied Microbiomics, School of Life Sciences, Center for Evolution and Medicine, Arizona State University, 1001 S. McAllister Ave, Tempe, AZ 85287-5001, USA

<sup>4</sup> Structural Biology Research Unit, Department of Clinical Laboratory Sciences, University of Cape Town, Rondebosch, Cape Town 7701, South Africa

Unedited gel pic

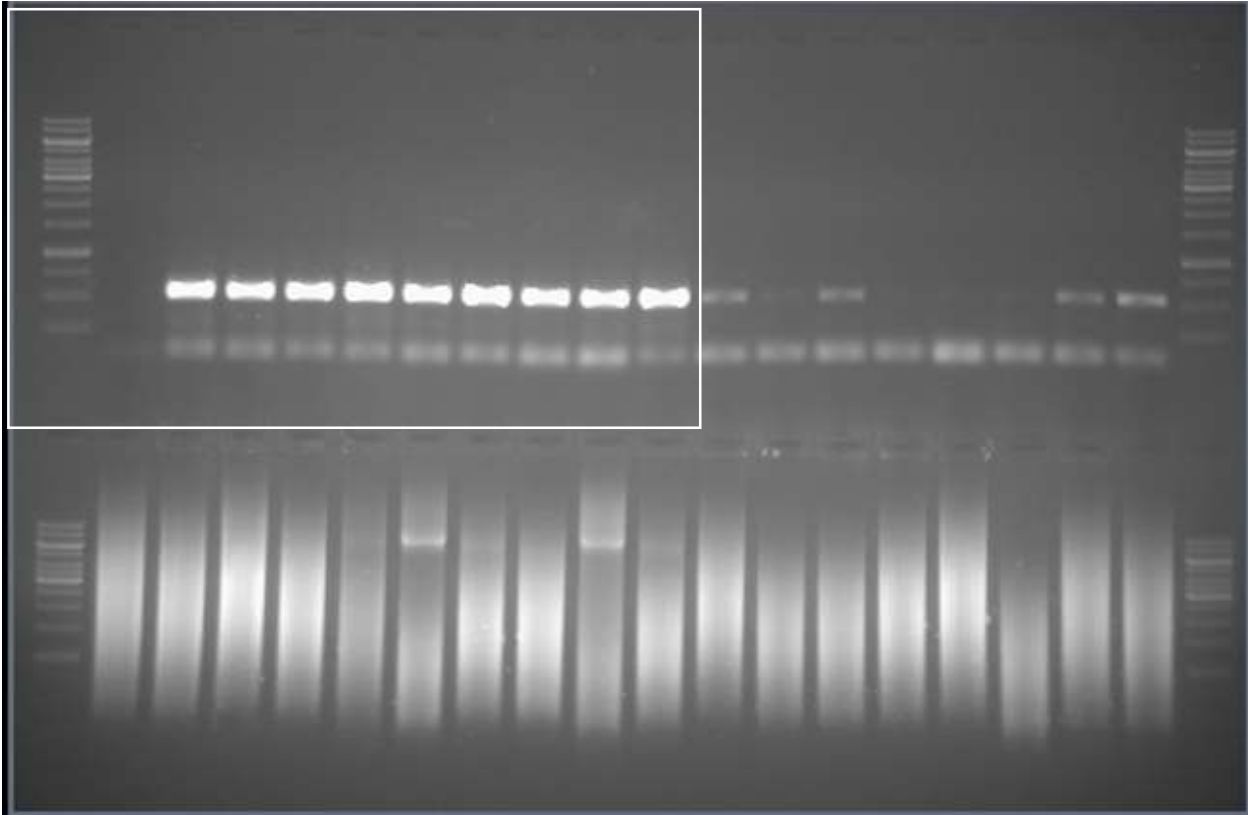

Supplementary Table 1. Virus hits obtained by BLASTx analysis of the contigs and scaffolds obtained from *V. arboreum* and *Vc x Vd* ‘Emerald’ to the non-redundant protein sequence database in GenBank. “adapted from dissertation by N. Saad, 2017, <https://ufdc.ufl.edu/UFE0051785/00001>”

| Plant species            | Contig/<br>Scaffold length (nt) | BLASTx                                | Family/ Genus         | Region of the genome | Query cov (%) | Identity (%) | E-value |
|--------------------------|---------------------------------|---------------------------------------|-----------------------|----------------------|---------------|--------------|---------|
| <i>Vc x Vd</i> ‘Emerald’ | 8293                            | <i>Blueberry red ringspot virus</i> * | <i>Caulimoviridae</i> | Complete genome      | 100           | 97           | 0       |
|                          | 992                             | Black grass varicosa-like virus       | <i>Rhabdoviridae</i>  | Polyprotein          | 70            | 37           | 6E-39   |
|                          | 861                             | <i>Vicia faba</i> partitivirus        | <i>Partitiviridae</i> | Putative RdRp        | 89            | 40           | 3E-60   |
|                          | 755                             | Persimmon latent virus                | <i>Rhabdoviridae</i>  | RdRp                 | 96            | 24           | 4E-08   |
|                          | 533                             | Persimmon latent virus                | <i>Rhabdoviridae</i>  | Pro-ala              | 26            | 47           | 3E-05   |

\*Refers to scaffold. RdRp: RNA dependent RNA polymerase; Pro-ala: proline-alanine-rich protein.
